# Supplementary material for: Function and Transcriptional Regulation of Bovine TORC2 Gene in Adipocytes: Roles of C/EBPγ, XBP1, INSM1 and ZNF263
Source: PubMed Central journal article supplement (PMC6769628; doi:10.3390/ijms20184338), 2019-09-04
Supplement: ijms-20-04338-s001.pdf [file ijms-20-04338-s001.pdf]

Table S1. Primers used in this paper

| Primer Name                      | Purpose          | Primer sequence                    | T <sub>m</sub> (°C) | Product length (bp) |
|----------------------------------|------------------|------------------------------------|---------------------|---------------------|
| Forward Fragment 1               | Luciferase assay | gagctcGACACGAGCTCAGTCAG            | 62.40               | 1990                |
| Forward Fragment 2               | Luciferase assay | gagctcCCAAATCTAGAAAGCTCCAAGACAG    | 62.12               | 1690                |
| Forward Fragment 3               | Luciferase assay | gagctcCGGTACTTGTAAGGCTGGAGGT       | 65.68               | 1370                |
| Forward Fragment 4               | Luciferase assay | gagctcCCCTGGCCAGCACATCAGTGGA       | 70.45               | 1047                |
| Forward Fragment 5               | Luciferase assay | gagctcCACCCCAGGGTTATTTTTG          | 62.41               | 801                 |
| Forward Fragment 6               | Luciferase assay | gagctcCTTCCCTCCCTGTCTCCACCCCT      | 71.24               | 504                 |
| Forward Fragment 7               | Luciferase assay | gagctcCAAATAACAATTCCCGGCGATC       | 63.66               | 259                 |
| Reverse TORC2                    | Luciferase assay | aagcttGTGTCAAGCTCAGCGGATCTTCTCA    | 66.25               | For all fragments   |
| C/EBP $\gamma$ -Bos-225 F        | Interference     | CCGGGCGUGAACGGAAUAATT              |                     |                     |
| C/EBP $\gamma$ -Bos-225 R        | Interference     | UUAUUCCGUUCACGCCCGGTT              |                     |                     |
| C/EBP $\gamma$ -Bos-358 F        | Interference     | GCUCACCCAUGGAUCGCAATT              |                     |                     |
| C/EBP $\gamma$ -Bos-358 R        | Interference     | UUGCGAUCCAUGGGUGAGCTT              |                     |                     |
| ZNF263-Bos-416 F                 | Interference     | GCUUCAGACGGUUCGCCUUTT              |                     |                     |
| ZNF263-Bos-416 R                 | Interference     | AAGCGGAACCGUCUGAAGCTT              |                     |                     |
| ZNF263-Bos-639 F                 | Interference     | GGUAUUGCAGAAAGAACUUTT              |                     |                     |
| ZNF263-Bos-639 R                 | Interference     | AAGUUCUUUCUGCAUAUCCTT              |                     |                     |
| INSM1-Bos-933 F                  | Interference     | GCUCAAGAUAAGGAGGGUTT               |                     |                     |
| INSM1-Bos-933 R                  | Interference     | ACCCUCCUUGAUCUUGAGCTT              |                     |                     |
| INSM1-Bos-1424 F                 | Interference     | CCGAGGACCUACUGGCCUUTT              |                     |                     |
| INSM1-Bos-1424 R                 | Interference     | AAGGCCAGUAGGUCCUCGGTT              |                     |                     |
| XBP1-Bos-337 F                   | Interference     | GGAGCAACAAGUGGUAGAUTT              |                     |                     |
| XBP1-Bos-337 R                   | Interference     | AUCUACCACUUGUUGUCCTT               |                     |                     |
| XBP1-Bos-460 F                   | Interference     | GGAUGCCCUAGUGACUGAATT              |                     |                     |
| XBP1-Bos-460 R                   | Interference     | UUCAGUCACUAGGGCAUCCTT              |                     |                     |
| XBP1 F                           | Mutation         | GGCTGTTAAAGAGTCGTACAAACAACTA       | 56.48               | 500                 |
| XBP1 R                           | Mutation         | GTACGACTCTTTAACAGCCCCAGTCACCG      | 64.96               | 500                 |
| C/EBP $\gamma$ F                 | Mutation         | GTTTCCTCTCTCGTAGGTCGTGACTGGGG      | 65.94               | 500                 |
| C/EBP $\gamma$ R                 | Mutation         | GACCTACGAGAGAGAAACGGACACCATT       | 65.94               | 500                 |
| INSM1 F                          | Mutation         | TCGTATTGCGTGACTATCTCTGTTAAAGA      | 56.69               | 500                 |
| INSM1 R                          | Mutation         | AGATAGTCACGCAATACGAGAGAGGAAAC      | 59.43               | 500                 |
| ZNF263 F                         | Mutation         | GGGAGGAACCAACAGCATGGAGCAAAATC      | 64.04               | 500                 |
| ZNF263 R                         | Mutation         | CATGCTGTGGTTCCTCCCTGCGTGGAGG       | 69.48               | 500                 |
| C/EBP $\gamma$ F non- biotinated | Probe            | CCGTTTCCTCTCTCGTATTGCGTGACTGGGGCTC | 69.84               |                     |
| C/EBP $\gamma$ R non- biotinated | Probe            | GAGCCCCAGTCACGCAATACGAGAGAGGAAACCG | 69.84               |                     |
| C/EBP $\gamma$ F Mutated         | Probe            | CCGTTTCCTCTCTCGTAGGTCGTGACTGGGGCTC | 70.89               |                     |
| C/EBP $\gamma$ R Mutated         | Probe            | GAGCCCCAGTCACGACCTACGAGAGAGGAAACCG | 70.89               |                     |
| XBP1 F non- biotinated           | Probe            | GGGGCTGTTAAAGAGTCACGTAACAACTACAA   | 61.23               |                     |
| XBP1 R non- biotinated           | Probe            | TTGTAGTTTGTTTACGTGACTCTTTAACAGCCCC | 61.23               |                     |
| XBP1 F Mutated                   | Probe            | GGGGCTGTTAAAGAGTCGTACAAACAACTACAA  | 61.23               |                     |
| XBP1 R Mutated                   | Probe            | TTGTAGTTTGTTTGTACGACTCTTTAACAGCCCC | 61.23               |                     |
| INSM1 F non- biotinated          | Probe            | TCTCGTATTGCGTGACTGGGGCTGTTAAAGAGTC | 65.76               |                     |
| INSM1 R non- biotinated          | Probe            | GACTCTTTAACAGCCCCAGTCACGCAATACGAGA | 65.76               |                     |
| INSM1 F Mutated                  | Probe            | TCTCGTATTGCGTGACTATCTCTGTTAAAGAGTC | 59.97               |                     |
| INSM1 R Mutated                  | Probe            | GACTCTTTAACAGAGATAGTCACGCAATACGAGA | 59.97               |                     |
| ZNF263 F non- biotinated         | Probe            | CAGGGAGGAACCAACAGGAGGAGCAAAATCCCC  | 70.35               |                     |
| ZNF263 R non- biotinated         | Probe            | CGGGATTTTGCTCCTCCCTGTGGTTCCTCCCTG  | 70.35               |                     |
| ZNF263 F Mutated                 | Probe            | CAGGGAGGAACCAACAGCATGGAGCAAAATCCCC | 69.20               |                     |
| ZNF263 R Mutated                 | Probe            | CGGGATTTTGCTCCTCCCTGTGGTTCCTCCCTG  | 69.20               |                     |
| C/EBP $\gamma$ F biotinated      | Probe            | CCGTTTCCTCTCTCGTATTGCGTGACTGGGGCTC | 69.84               |                     |
| C/EBP $\gamma$ R biotinated      | Probe            | GAGCCCCAGTCACGCAATACGAGAGAGGAAACCG | 69.84               |                     |
| XBP1 F biotinated                | Probe            | GGGGCTGTTAAAGAGTCACGTAACAACTACAA   | 61.23               |                     |
| XBP1 R biotinated                | Probe            | TTGTAGTTTGTTTACGTGACTCTTTAACAGCCCC | 61.23               |                     |
| INSM1 F biotinated               | Probe            | TCTCGTATTGCGTGACTGGGGCTGTTAAAGAGTC | 65.76               |                     |
| INSM1 R biotinated               | Probe            | GACTCTTTAACAGCCCCAGTCACGCAATACGAGA | 65.76               |                     |
| ZNF263 F biotinated              | Probe            | CAGGGAGGAACCAACAGGAGGAGCAAAATCCCC  | 70.35               |                     |
| ZNF263 R biotinated              | Probe            | CGGGATTTTGCTCCTCCCTGTGGTTCCTCCCTG  | 70.35               |                     |
| R1-RACE TORC2                    | Probe            | CCCTCACCCGGGTGGAGCCGATGTC          | 78                  | 266                 |
| R2-RACE TORC2                    | Probe            | GCGTTCGCCTCTTTCGCTACGGCT           | 75                  | 359                 |
| TORC2 F                          | Expression       | GAGGAGGTGATGATGGAC                 | 52.05               | 138                 |
| TORC2 R                          | Expression       | GCTCTGGAACCTCGGCTAG                | 55.57               | 138                 |
| C/EBP $\gamma$ F                 | Expression       | CTGGAGGGGCCAGGTACA                 | 60.22               |                     |

|                  |             |                                    |       |     |
|------------------|-------------|------------------------------------|-------|-----|
| C/EBP $\gamma$ R | Expression  | ATACTCAGGCTCATGCCAGC               | 57.62 |     |
| XBP1 F           | Expression  | AAGCCAAAGTAGAGGGGGTGTG             | 59.71 |     |
| XBP1 R           | Expression  | CTGGGATGCTGAGAAGGGAAAA             | 57.23 |     |
| INSM1 F          | Expression  | CACATCAACAAGTGCCACCC               | 57.22 |     |
| INSM1 R          | Expression  | AGCGGAGACCACACTTTCAC               | 57.80 |     |
| ZNF263 F         | Expression  | GCAAAGGATTAGCATAAAACTGAAAA         | 51.41 |     |
| ZNF263 R         | Expression  | AGGACAGAATAAGGCACCCACA             | 58.38 |     |
| GAPDH F          | Expression  | AGTTCAACGGCACAGTCAAGG              | 58.09 | 124 |
| GAPDH R          | Expression  | ACCACATACTCAGCACCAGCA              | 58.98 | 124 |
| CDK1 F           | Expression  | AGTGGAACCAGGAAGCTTAG               |       |     |
| CDK1 R           | Expression  | ATTTCGTTGGCAGGATCATAGA             |       |     |
| CDK2 F           | Expression  | GGGTCCCTGTTCTACTTATAC              |       |     |
| CDK2 R           | Expression  | CCACTGCTGTGGAGTAGTATT              |       |     |
| PCNA F           | Expression  | CCTTGGTGCAGCTAACCCCT               |       |     |
| PCNA R           | Expression  | TTGGACATGCTGGTGAGGTT               |       |     |
| SREBP-1 F        | Expression  | CAATGTGTGAGAAGGCCAGT               |       |     |
| SREBP-1 R        | Expression  | ACAAGGAGCAGGTCACACAG               |       |     |
| ACCa F           | Expression  | CTCCAACCTCAACCACTACGG              |       |     |
| ACCa R           | Expression  | GGGGAATCACAGAAGCAGCC               |       |     |
| PPAR $\gamma$ F  | Expression  | GAGATCACAGAGTACGCCAAG              |       |     |
| PPAR $\gamma$ R  | Expression  | GGGCTCCATAAAGTCACCAA               |       |     |
| CEBP $\alpha$ F  | Expression  | ATCTGCCGAACACGAGACG                |       |     |
| CEBP $\alpha$ R  | Expression  | CCAGGAACCTCGTCTGAA                 |       |     |
| ELOVL6 F         | Expression  | CGTAGCGACTCCGAAGATCA               |       |     |
| ELOVL6 R         | Expression  | ACAGGGCGGAAAACAGGAAA               |       |     |
| PLIN2 F          | Expression  | CTGTCTACCAAGCTCTGCTC               |       |     |
| PLIN2 R          | Expression  | CGATGCTTCTCTCCACTCC                |       |     |
| P27 F            | Expression  | AGATGTCAAACGTGCGAGTG               |       |     |
| P27 R            | Expression  | GCCAAAGAGGTTCTGCAAG                |       |     |
| P21 F            | Expression  | GACCAGCATGACAGATTTCTACCA           |       |     |
| P21 R            | Expression  | TGAAGGCCCAAGGCAAAAAG               |       |     |
| Mcm6 F           | Expression  | TCTTCATGGAGGATTACAGTGCG            |       |     |
| Mcm6 R           | Expression  | CGAGATTGACATCAGGTGTTCC             |       |     |
| TORC2 F          | CDS cloning | GTTTAAACTTAAGCTTATGGCGACGTCGGGAGCG |       |     |
| TORC2 R          | CDS cloning | GCCCTTAGACTCGAGTACTGCAGCCGGTCACTG  |       |     |

**Table S2.** Comparative transcriptional variation of different fragments with activity of pGL3-basic vector analyzed through Tukey's multiple comparison test.

| Fragments comparisons     | Mean variation | 95% CI of diff.  | Significance | Summary |
|---------------------------|----------------|------------------|--------------|---------|
| PGL3-Basic vs. -69/+190   | -10.45         | -36.64 to 15.75  | No           | Ns      |
| PGL3-Basic vs. -314/+190  | -71.54         | -97.73 to -45.34 | Yes          | ****    |
| PGL3-Basic vs. -611/+190  | -81.60         | -107.8 to -55.40 | Yes          | ****    |
| PGL3-Basic vs. -857/+190  | -31.65         | -57.85 to -5.458 | Yes          | *       |
| PGL3-Basic vs. -1180/+190 | -49.57         | -75.76 to -23.37 | Yes          | ***     |
| PGL3-Basic vs. -1500/+190 | -32.07         | -58.26 to -5.871 | Yes          | *       |
| PGL3-Basic vs. -1800/+190 | -44.60         | -70.79 to -18.40 | Yes          | ***     |
